# Supplementary material for: Stability of Major Geogenic Cations in Drinking Water—An Issue of Public Health Importance: A Danish Study, 1980–2017
Source: Int J Environ Res Public Health. 2018 Jun 8;15(6):1212. doi: 10.3390/ijerph15061212 (PMC6024924; doi:10.3390/ijerph15061212)
Supplement: Supplementary file 1 [file ijerph-15-01212-s001.pdf]

# Supplementary Materials

Figure S1: Workflow

Workflow describing the data management for combining data sets into new data sets and how these are used in statistical analyses.

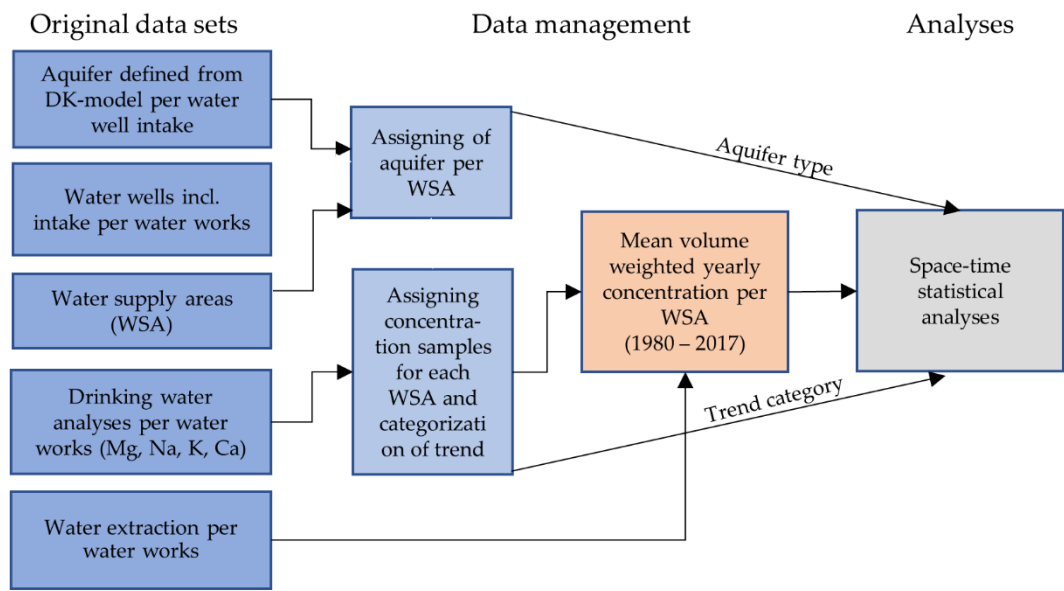

Figure S1: Workflow during data management and analyses. Stippled lines indicate that data sets are used in the discussion of the results as well as in the analyses.

**Figure S2: Additional description of trend categories.**

| Description                                                                                                                                                                                                                                                                                                                                                                                                                                                                                        | Illustration                                                                                                      |
|----------------------------------------------------------------------------------------------------------------------------------------------------------------------------------------------------------------------------------------------------------------------------------------------------------------------------------------------------------------------------------------------------------------------------------------------------------------------------------------------------|-------------------------------------------------------------------------------------------------------------------|
| <p><i>Constant:</i> Concentration interval &lt; standard deviation of the concentration for all samples, excluding the 10% lowest and 10% highest measured concentrations. Furthermore, no significant increase or decrease in concentration during the study period.</p>                                                                                                                                                                                                                          | <p>Constant</p> 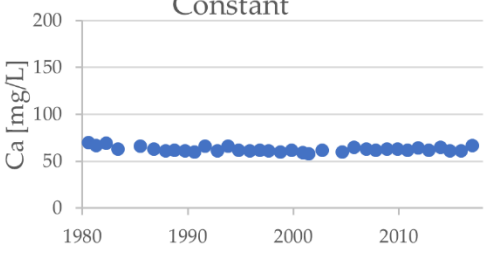                |
| <p><i>Significant increase/decrease:</i> Significant increase or decrease in concentration during the study period. Categorized based on linear regression where 95%-confidence intervals of the trends were calculated and the null hypothesis (no trend over time) was tested on a significance (<math>\alpha=0.05</math>) and a degree of determination, <math>R^2 &gt; 0.1</math></p>                                                                                                          | <p>Increasing / decreasing</p> 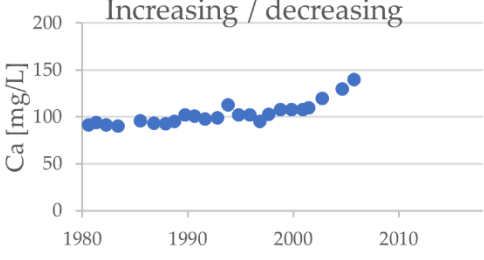 |
| <p><i>Change-point:</i> Two or more different, but constant concentrations level or a significant change-point was observed (two connected regression lines). The change-point analysis was performed using two analyses. First, a Bayesian analysis with Markov chain Monte Carlo simulation of a change point regression model estimating the change point, and two slopes [39]. Secondly, the difference in concentration means before and after the change-point was tested with a t-test.</p> | <p>Change-point</p> 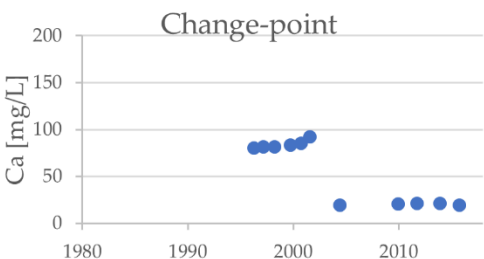           |
| <p><i>Parallel:</i> Two or more constant concentration levels occurring at the same time were detected visually. Only WSAs which were not earlier categorized were included in the visual analyze.</p>                                                                                                                                                                                                                                                                                             | <p>Parallel</p> 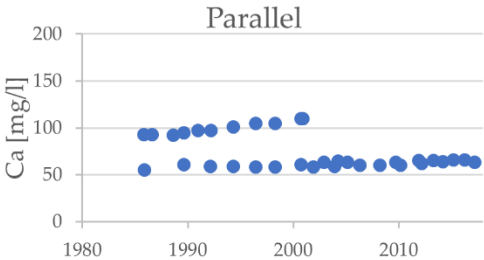              |
| <p><i>Fluctuating:</i> WSAs that do not fit into categories 1-5.</p>                                                                                                                                                                                                                                                                                                                                                                                                                               | <p>Fluctuating</p> 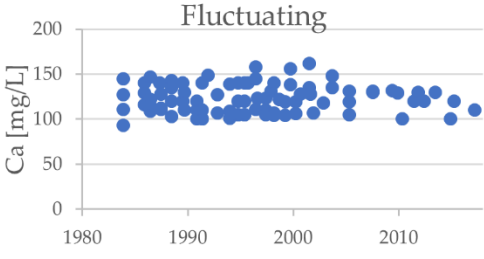           |

**Figure S2** Description and selected illustrations of the different trends in concentration. All examples are for Mg.

**Table S1: Additional cluster analyses**

**Table S1** Statistical significant clusters ( $\leq 0.05$ ) of high (hot spot) and low concentrations (cold spot) of Na, K, Mg and Ca in drinking water. Up to 50% of data points were included in the clusters. All clusters are of mean concentration 2011-2015.

| Cation | Transformation | Type of cluster | No. of WSA |       | Mean conc. [mg/L] |                 | <i>p</i> -value |
|--------|----------------|-----------------|------------|-------|-------------------|-----------------|-----------------|
|        |                |                 | In cluster | Total | Inside cluster    | Outside cluster |                 |
| Na     | None           | Hot             | 500        | 2345  | 47.98             | 23.09           | $\leq 0.001$    |
| Na     | None           | Cold            | 1156       | 2345  | 20.74             | 35.83           | 0.002           |
| Na     | Log            | Hot             | 537        | 2345  | 36.23             | 19.30           | $\leq 0.001$    |
| Na     | Log            | Cold            | 980        | 2345  | 17.12             | 26.84           | $\leq 0.001$    |
| Na     | Square root    | Hot             | 537        | 2345  | 41.22             | 20.88           | $\leq 0.001$    |
| Na     | Square root    | Cold            | 1073       | 2345  | 18.75             | 30.80           | $\leq 0.001$    |
| K      | None           | Hot             | 902        | 2344  | 4.35              | 2.42            | $\leq 0.001$    |
| K      | None           | Cold            | 1154       | 2344  | 2.26              | 4.03            | 0.003           |
| K      | Log            | Hot             | 999        | 2344  | 3.74              | 2.01            | $\leq 0.001$    |
| K      | Log            | Cold            | 1172       | 2344  | 1.97              | 3.53            | $\leq 0.001$    |
| K      | Square root    | Hot             | 914        | 2344  | 4.08              | 2.22            | $\leq 0.001$    |
| K      | Square root    | Cold            | 1048       | 2344  | 2.04              | 3.65            | $\leq 0.001$    |
| Mg     | None           | Hot             | 693        | 2345  | 18.19             | 8.14            | $\leq 0.001$    |
| Mg     | None           | Cold            | 1171       | 2345  | 7.02              | 15.19           | $\leq 0.001$    |
| Mg     | Log            | Hot             | 899        | 2345  | 15.18             | 6.75            | $\leq 0.001$    |
| Mg     | Log            | Cold            | 1154       | 2345  | 6.17              | 13.46           | $\leq 0.001$    |
| Mg     | Square root    | Hot             | 693        | 2345  | 17.39             | 7.67            | $\leq 0.001$    |
| Mg     | Square root    | Cold            | 1170       | 2345  | 6.60              | 14.36           | $\leq 0.001$    |
| Ca     | None           | Hot             | 1154       | 2344  | 95.92             | 66.14           | $\leq 0.001$    |
| Ca     | None           | Cold            | 894        | 2344  | 63.55             | 91.44           | $\leq 0.001$    |

**Table S2: Comparison of number of waterworks and concentration trend**

**Table S2** Comparison between number of waterworks and trend in concentration. Data is presented for Ca.

| <b>Trend in concentration</b> | <b>One waterworks per WSA</b> | <b>More than one waterworks per WSA</b> |
|-------------------------------|-------------------------------|-----------------------------------------|
| Too Few                       | 25                            | 0                                       |
| Constant                      | 719                           | 67                                      |
| Decreasing/increasing         | 680                           | 151                                     |
| Change-point                  | 81                            | 22                                      |
| Parallel                      | 9                             | 139                                     |
| Fluctuating                   | 380                           | 277                                     |
